# Supplementary figures and images for: CK2 phosphorylation of the PRH/Hex homeodomain functions as a reversible switch for DNA binding
Source: PubMed Central journal article supplement — Nucleic Acids Res. 2009 Mar 25;37(10):3288–300. doi: 10.1093/nar/gkp197 (PMC2691835; doi:10.1093/nar/gkp197), 2009-03-25

A

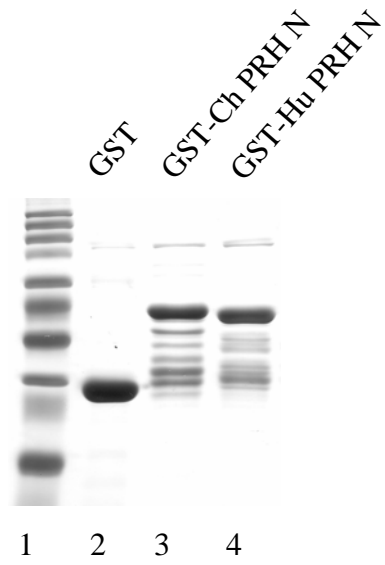

B

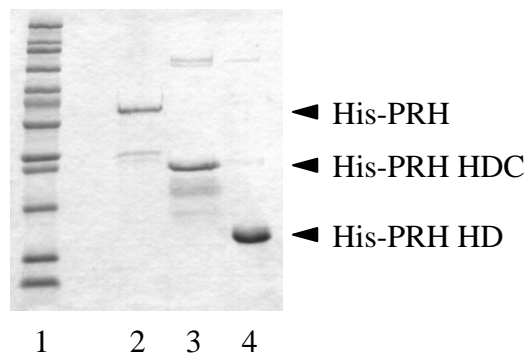

A

Mouse anti-PRH

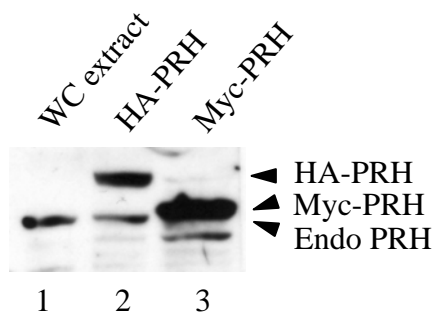

B

Rabbit anti-PRH

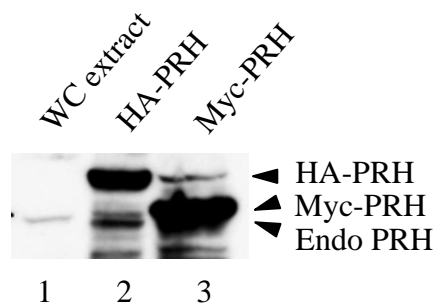

Supplement: gkp197_1.pdf [file gkp197_1.pdf]
